# Supplementary material for: Clarifying the degradation process of luminescent inorganic perovskite nanocrystals
Source: PubMed Central journal article supplement (PMC11629105; doi:10.1039/d4ra07548j), 2024-12-10
Supplement: RA-014-D4RA07548J-s001.pdf [file RA-014-D4RA07548J-s001.pdf]

## Supplementary Information

### **Clarifying Degradation Process of Luminescent Inorganic Perovskite Nanocrystals**

Yong Bin Kim <sup>ab</sup>, Sung Hun Kim <sup>a</sup>, Yong-Ryun Jo <sup>c</sup>, Sang-Youp Yim <sup>c</sup>, Sang-Hyun Chin<sup>\*d</sup>, Kyoung-Duck Park<sup>\*b</sup> and Hong Seok Lee<sup>\*a</sup>

a. Department of Physics, Research Institute Physics and Chemistry, Jeonbuk National University, Jeonju 54896, Republic of Korea. Email: hslee1@jbnu.ac.kr

b. Department of Physics, Pohang University of Science and Technology (POSTECH), Pohang 37673, Republic of Korea. Email: parklab@postech.ac.kr

c. Advanced Photonics Research Institute, Gwangju Institute of Science and Technology, Gwangju 61005, Republic of Korea

d. Department of Physics and van der Waals Materials Research Centre, Yonsei University, Seoul 03722, Republic of Korea. Email: sanghyunchin@yonsei.ac.kr

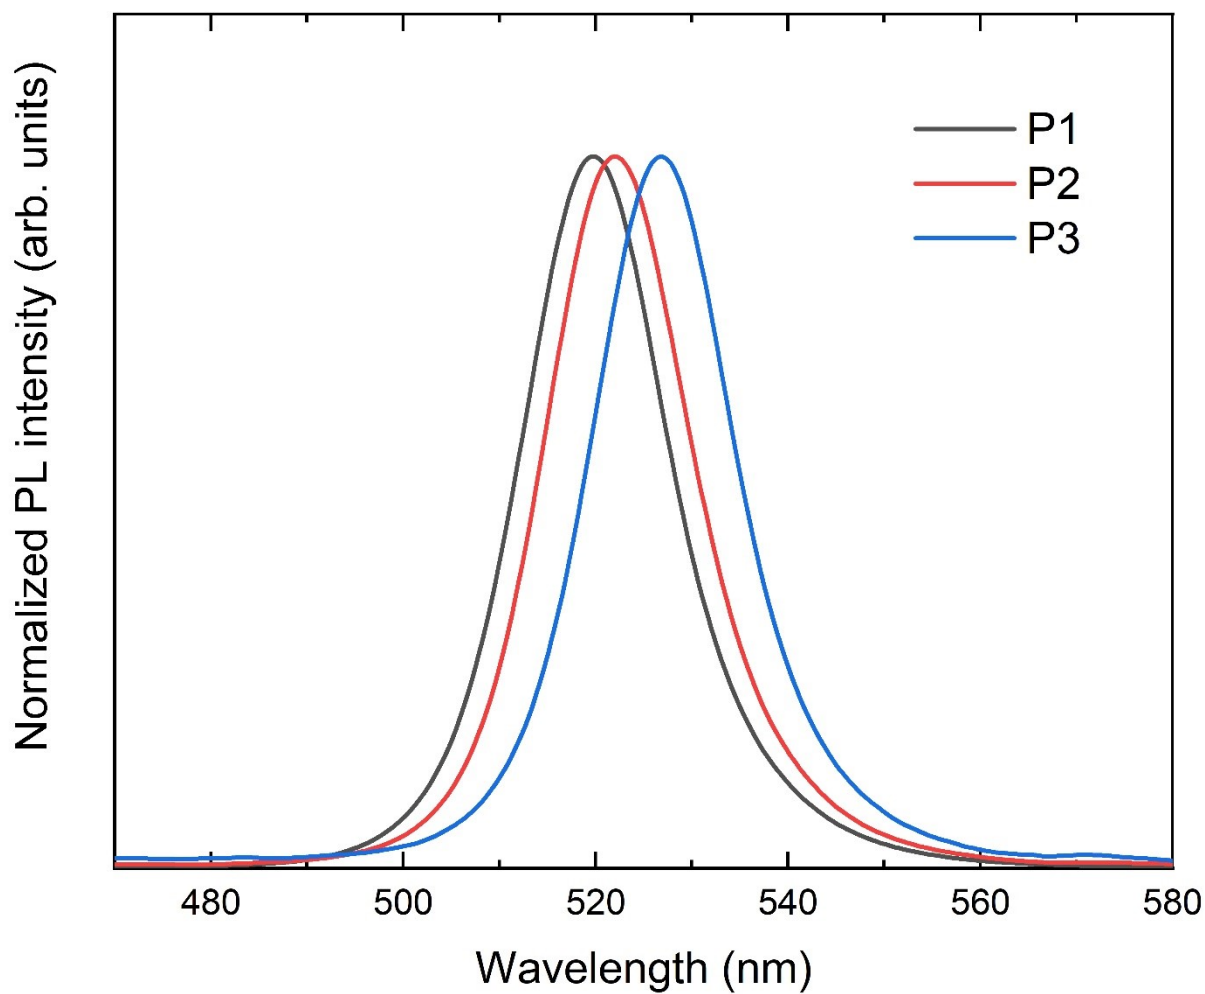

**Fig. S1.** Normalized PL spectra of pristine P1 (reaction time: 5 s), P2 (reaction time: 10 min), and P3 (reaction time: 60 min). The emission peaks are 519, 522, and 527 nm, respectively.

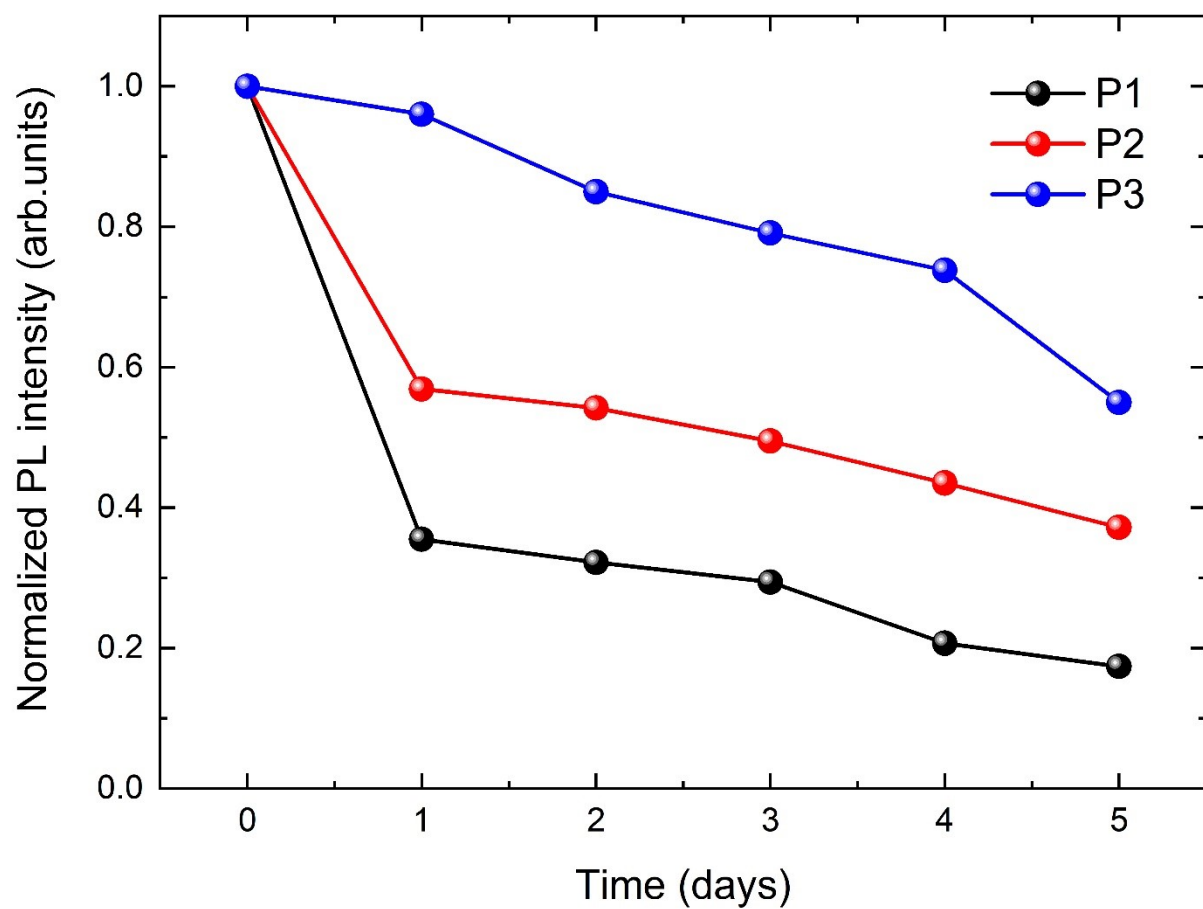

**Fig. S2.** Normalized PL intensity of P1, P2, and P3 on air exposure.

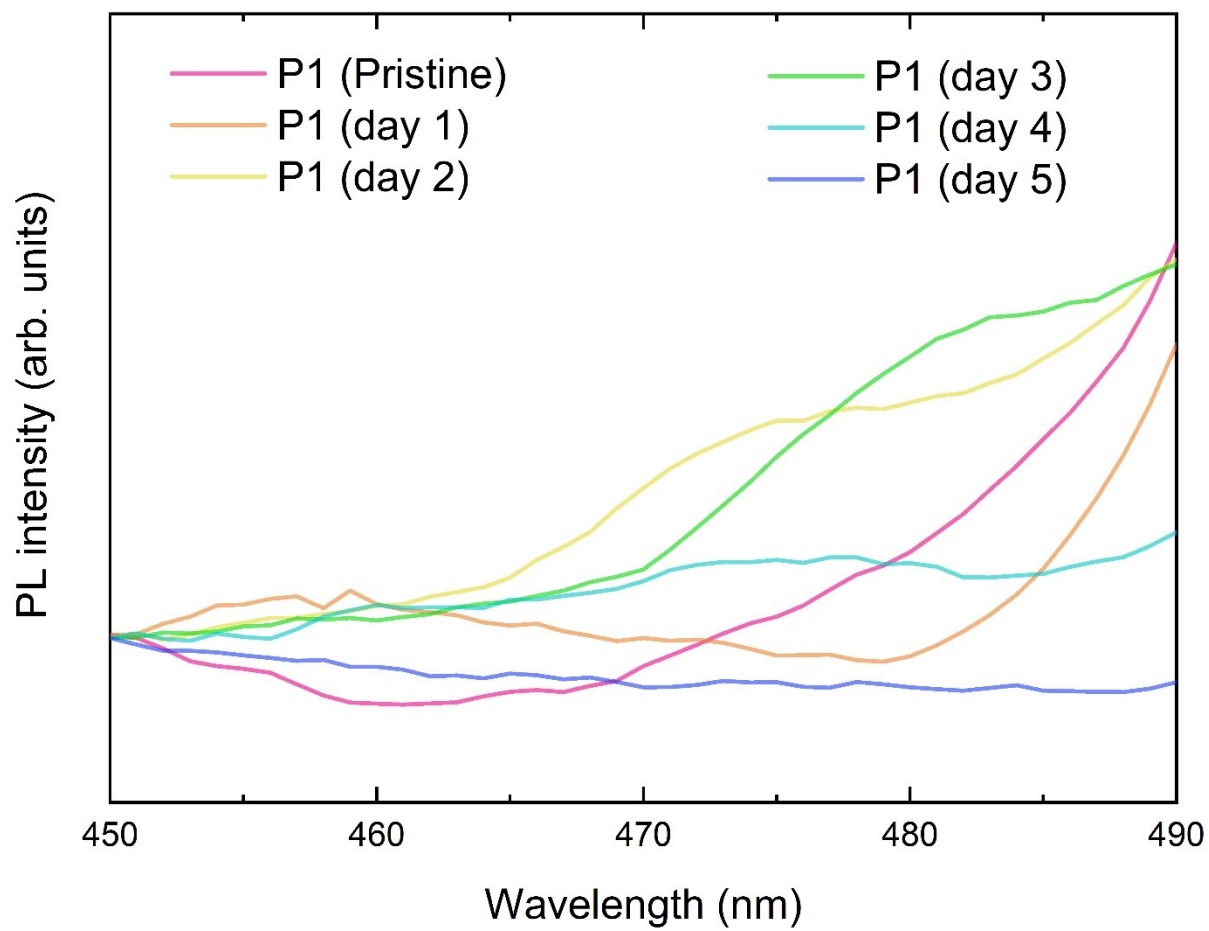

**Fig. S3.** Magnified PL spectra of P1 on air exposure.

**Table S1** The average lifetime components and their relative amplitudes of P1, P2, and P3.

| <b>P1</b>       | <b><math>\tau_1</math> (ns)</b> | <b><math>\tau_2</math> (ns)</b> | <b><math>C_1</math></b> | <b><math>C_2</math></b> | <b><math>\tau_{Avg}</math> (ns)</b> |
|-----------------|---------------------------------|---------------------------------|-------------------------|-------------------------|-------------------------------------|
| <b>Pristine</b> | 4.736                           | 21.659                          | 0.741                   | 0.259                   | 9.123                               |
| <b>Day2</b>     | 3.622                           | 14.271                          | 0.806                   | 0.194                   | 5.683                               |
| <b>Day5</b>     | 3.058                           | 11.946                          | 0.856                   | 0.144                   | 4.334                               |

| <b>P2</b>       | <b><math>\tau_1</math> (ns)</b> | <b><math>\tau_2</math> (ns)</b> | <b><math>C_1</math></b> | <b><math>C_2</math></b> | <b><math>\tau_{Avg}</math> (ns)</b> |
|-----------------|---------------------------------|---------------------------------|-------------------------|-------------------------|-------------------------------------|
| <b>Pristine</b> | 3.53                            | 20.644                          | 0.819                   | 0.181                   | 6.631                               |
| <b>Day2</b>     | 2.793                           | 14.271                          | 0.809                   | 0.191                   | 4.982                               |
| <b>Day5</b>     | 2.857                           | 14.393                          | 0.854                   | 0.146                   | 4.544                               |

| <b>P3</b>       | <b><math>\tau_1</math> (ns)</b> | <b><math>\tau_2</math> (ns)</b> | <b><math>C_1</math></b> | <b><math>C_2</math></b> | <b><math>\tau_{Avg}</math> (ns)</b> |
|-----------------|---------------------------------|---------------------------------|-------------------------|-------------------------|-------------------------------------|
| <b>Pristine</b> | 3.211                           | 24.852                          | 0.791                   | 0.209                   | 7.733                               |
| <b>Day2</b>     | 3.348                           | 15.006                          | 0.776                   | 0.224                   | 5.96                                |
| <b>Day5</b>     | 2.793                           | 15.006                          | 0.824                   | 0.176                   | 4.945                               |
